# Supplementary material for: A quantitative study of vapor diffusions for crystallizations: rates and solvent parameter changes
Source: Royal Society of Chemistry journal article supplement (doi:10.1039/c8dt01891j), 2019-01-01
Supplement: c8dt01891j2.pdf [file c8dt01891j2.pdf]

Electronic Supplementary Information

to accompany

**A quantitative study of vapor diffusions for crystallizations:  
rates and solvent parameter changes.**

Michael J. Wen,<sup>a</sup> Matthew T. Jackson,<sup>a</sup> Charles M. Garner,<sup>a,b\*</sup>

<sup>a</sup>Dept. of Chemistry & Biochemistry, Baylor University; <sup>b</sup>Dept. of Chemistry, Univ. of Memphis

**Table of Contents**

| Content                                                     | Page   |
|-------------------------------------------------------------|--------|
| Figure 1: Time-lapse movie showing standard apparatus       | 1      |
| Table 1: Relevant properties of solvents used in this study | 2      |
| Figure 2: Apparatus for variable-temperature diffusions     | 3      |
| Calculations of Hansen "distances"                          | 3 - 12 |
| References                                                  | 12     |

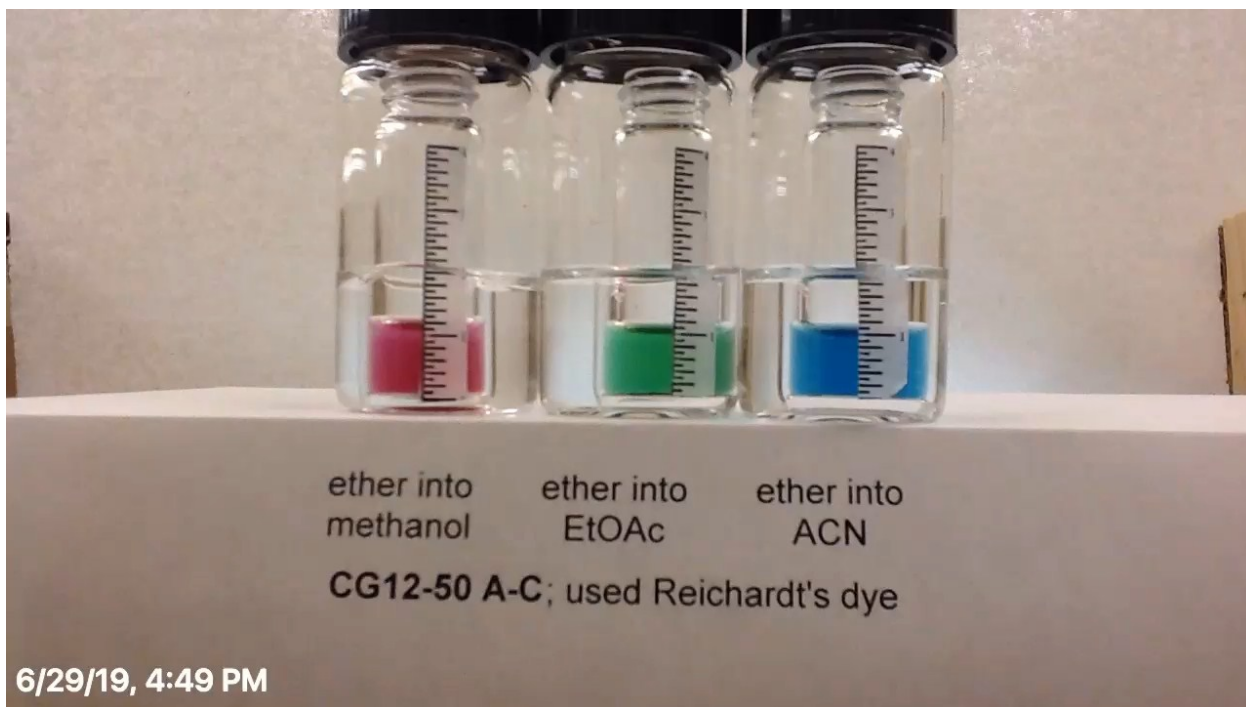

Figure 1: Movie showing standard apparatus used in these studies (one dram inner, 20 mL outer) for three solvent combinations over 60 h. Photos were taken at 1-h intervals, and the playback rate is six hours per second. Note the color changes of the solvatochromic dye; the center vial becomes colorless due to precipitation of the dye.

| solvent                             | relative polarity <sup>1</sup> | BP (°C) | density (g/mL) | 20 °C vapor press (torr) | viscosity (cp) | Hansen Parameters <sup>2</sup> |                |                   | Molar <sup>2</sup> vol (mL) |
|-------------------------------------|--------------------------------|---------|----------------|--------------------------|----------------|--------------------------------|----------------|-------------------|-----------------------------|
|                                     |                                |         |                |                          |                | $\delta_{disp}$                | $\delta_{pol}$ | $\delta_{H-bond}$ |                             |
| pentane                             | 0.009                          | 36.1    | 0.626          | 430                      | 0.24           | 14.5                           | 0.0            | 0.0               | 116.2                       |
| triethylamine (TEA)                 | 0.043                          | 88.8    | 0.723          | 59                       | 0.36           | 17.8                           | 0.4            | 1.0               | 138.6                       |
| toluene                             | 0.099                          | 111     | 0.867          | 22                       | 0.59           | 18.0                           | 1.4            | 2.0               | 106.8                       |
| benzene                             | 0.111                          | 80.1    | 0.876          | 76                       | 0.65           | 18.4                           | 0.0            | 2.0               | 89.4                        |
| ether                               | 0.117                          | 34.5    | 0.713          | 440                      | 0.24           | 14.5                           | 2.9            | 5.1               | 104.8                       |
| 2-methyltetrahydrofuran<br>2-Me-THF | 0.179                          | 80.2    | 0.854          | 102                      | 0.60           | 16.9                           | 5.0            | 4.3               | 100.2                       |
| THF                                 | 0.207                          | 66.0    | 0.889          | 150                      | 0.55           | 16.8                           | 5.7            | 8.0               | 81.7                        |
| ethyl acetate (EtOAc)               | 0.228                          | 77.2    | 0.897          | 73                       | 0.46           | 15.8                           | 5.3            | 7.2               | 98.5                        |
| chloroform                          | 0.259                          | 61.2    | 1.490          | 158                      | 0.58           | 17.8                           | 3.1            | 5.7               | 80.7                        |
| pyridine                            | 0.302                          | 116     | 0.982          | 15                       | 0.95           | 19.0                           | 8.8            | 5.9               | 80.9                        |
| dichloromethane (DCM)               | 0.309                          | 39.6    | 1.330          | 356                      | 0.45           | 18.2                           | 6.3            | 6.1               | 63.9                        |
| 1,2-dichloroethane<br>(DCE)         | 0.327                          | 83.5    | 1.235          | ~70                      | 0.79           | 19.0                           | 7.4            | 4.1               | 79.4                        |
| DMPU                                | 0.352                          | 247     | 1.06           | <0.3                     | 1.94           | 17.8                           | 9.5            | 9.3               | 120.9                       |
| acetone                             | 0.355                          | 56.1    | 0.791          | 180                      | 0.32           | 15.5                           | 10.4           | 7.0               | 74                          |
| NMP                                 | 0.355                          | 203     | 1.03           | 0.3                      | 1.65           | 18.0                           | 12.3           | 7.2               | 96.5                        |
| DMF                                 | 0.386                          | 153     | 0.944          | 3                        | 0.92           | 17.4                           | 13.7           | 11.3              | 77                          |
| DMSO                                | 0.444                          | 189     | 1.10           | <0.5                     | 2.24           | 18.4                           | 16.4           | 10.2              | 71.3                        |
| acetonitrile                        | 0.460                          | 81.6    | 0.786          | 73                       | 0.37           | 15.3                           | 18.0           | 6.1               | 52.6                        |
| acetic acid                         | 0.648                          | 118     | 1.05           | 12                       | 1.31           | 14.5                           | 8.0            | 13.5              | 57.1                        |
| ethanol                             | 0.654                          | 78.3    | 0.789          | 44                       | 1.10           | 15.8                           | 8.8            | 19.4              | 58.5                        |
| methanol                            | 0.762                          | 64.5    | 0.792          | 96                       | 0.55           | 15.1                           | 12.3           | 22.3              | 40.7                        |
| 2,2,2-trifluoroethanol<br>(TFE)     | 0.898                          | 78.0    | 1.39           | 53                       | 0.90           | 15.4                           | 8.3            | 16.4              | 72.3                        |
| water                               | 1.000                          | 100     | 1.00           | 13                       | 1.00           | 18.1                           | 17.1           | 16.9              | 18                          |

Table 1: Relevant properties of solvents used in these diffusion studies at 20 °C, ranked by increasing polarity.<sup>1</sup>

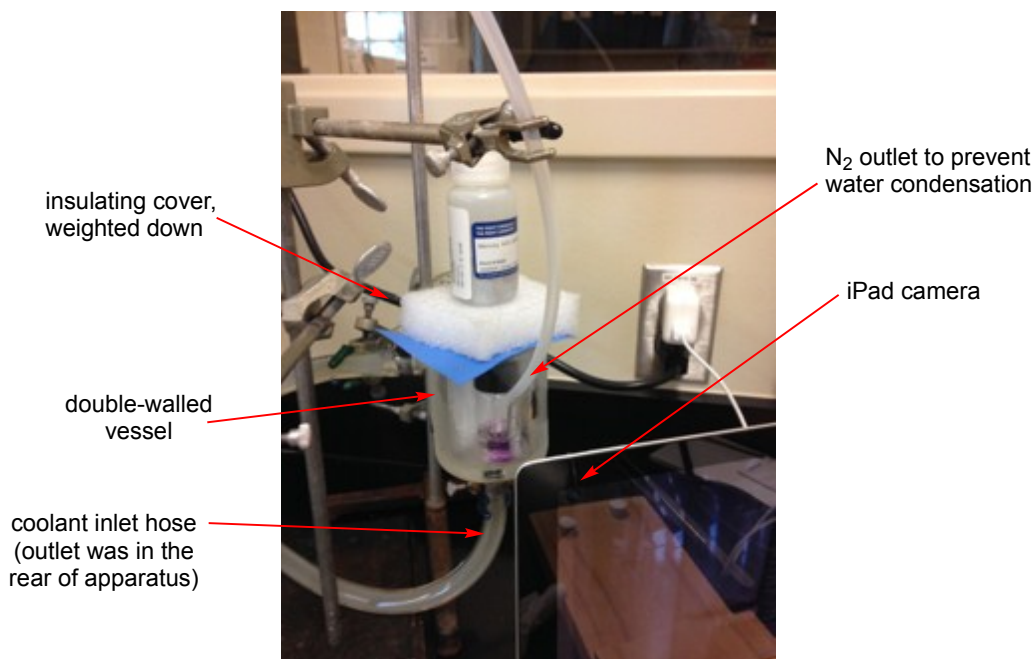

Figure 2: Apparatus for studying variable-temperature diffusions. Note insulating seal above and nitrogen outlet tube to keep the camera access area condensation-free.

### Hansen Solubility parameter calculations

The Hansen approach requires the use of volume percents rather than mole percents. The mole percents determined by NMR were converted to the volume percents as follows:

$$\text{volume \% A} = \frac{(\text{mol\% A}) \cdot (\text{molar volume A}) \cdot 100\%}{(\text{mol\% A}) \cdot (\text{molar volume A}) + (\text{mol \% B}) \cdot (\text{molar volume B})}$$

The individual Hansen solubility parameters (D for  $\delta_{\text{disp}}$ , P for  $\delta_{\text{pol}}$ , and H for  $\delta_{\text{H-bond}}$ ) for solvent mixtures are simply the sum of the products of the solubility parameter for each pure solvent<sup>2</sup> times the volume percent of that solvent in the mixture:

$$\delta_{\text{D mixture}} = (\text{volume \% A}) \cdot (\delta_{\text{D,A}}) + (\text{volume percent B}) \cdot (\delta_{\text{D,B}})$$

The "distance traversed" from pure solvent to the mixture at 24 h is calculated as follows:

$$\text{distance traversed} = \sqrt{[ (4 \cdot (D_{\text{mix}} - D_{\text{pure}})^2) + (P_{\text{mix}} - P_{\text{pure}})^2 + (H_{\text{mix}} - H_{\text{pure}})^2 ]}$$

Note that the dispersion parameter is favored by a factor of four, a relationship demonstrated empirically and predicted theoretically.

The calculations are given in the format below, with explanations for the various terms. The  $\text{HSP}_{\text{mix}}$  is given, and is analogous to an overall "polarity" or "solvent strength", which roughly correlates with

other polarity scales, but in itself has little quantitative value for the same reasons that polarity values do not (i.e., the various D, P and H contributions must be considered separately).

obtained by multiplying each mol percent by its molar volume, then normalizing

overall Hansen value for pure solvents

| E1              | mol%@24h | vol %@24h   | D     | P    | H    | total HSP  |        |
|-----------------|----------|-------------|-------|------|------|------------|--------|
| <b>methanol</b> | 47.3     | 25.8        | 15.1  | 12.3 | 22.3 | 49.7       |        |
| <b>ether</b>    | 52.7     | 74.2        | 14.5  | 2.9  | 5.1  | 22.5       |        |
| 3.2 mL          |          |             |       |      |      |            |        |
|                 |          |             | Dmix  | Pmix | Hmix | "distance" | HSPmix |
|                 |          | for 24h mix | 14.66 | 5.33 | 9.55 | 14.6       | 29.5   |

inner solvent

inner vial volume (mL) at 24 h

diffusant (outer solvent)

HSP values of pure and inner solvent mixture at 24 h

distance traversed in Hansen solubility space in 24 h

overall Hansen value for mixture at 24 h

| Calculations for ether diffusions at 24 h diffusion time (ranked by decreasing HSP distance) |          |             |      |      |      |            |        |
|----------------------------------------------------------------------------------------------|----------|-------------|------|------|------|------------|--------|
| E1                                                                                           | mol%@24h | vol %@24h   | D    | P    | H    | total HSP  |        |
| <b>methanol</b>                                                                              | 47.3     | 25.8        | 15.1 | 12.3 | 22.3 | 49.7       |        |
| <b>ether</b>                                                                                 | 52.7     | 74.2        | 14.5 | 2.9  | 5.1  | 22.5       |        |
| 3.2 mL                                                                                       |          |             |      |      |      |            |        |
|                                                                                              |          |             | Dmix | Pmix | Hmix | "distance" | HSPmix |
|                                                                                              |          | for 24h mix | 14.7 | 5.3  | 9.5  | 14.6       | 29.5   |
| E2                                                                                           | mol%@24h | vol %@24h   | D    | P    | H    | total HSP  |        |
| <b>ethanol</b>                                                                               | 37.0     | 24.7        | 15.8 | 8.8  | 19.4 | 44         |        |
| <b>ether</b>                                                                                 | 63.0     | 75.3        | 14.5 | 2.9  | 5.1  | 22.5       |        |
| 3.2                                                                                          |          |             |      |      |      |            |        |
|                                                                                              |          |             | Dmix | Pmix | Hmix | "distance" | HSPmix |
|                                                                                              |          | for 24h mix | 14.8 | 4.4  | 8.6  | 11.8       | 27.8   |
| E3                                                                                           | mol%@24h | vol %@24h   | D    | P    | H    | total HSP  |        |
| <b>acetonitrile</b>                                                                          | 38.6     | 24.0        | 15.3 | 18.0 | 6.1  | 39.4       |        |
| <b>ether</b>                                                                                 | 61.4     | 76.0        | 14.5 | 2.9  | 5.1  | 22.5       |        |
| 3.2                                                                                          |          |             |      |      |      |            |        |
|                                                                                              |          |             | Dmix | Pmix | Hmix | "distance" | HSPmix |
|                                                                                              |          | for 24h mix | 14.7 | 6.5  | 5.3  | 11.6       | 26.6   |

|                  |          |             |      |      |      |            |        |
|------------------|----------|-------------|------|------|------|------------|--------|
| <b>E4</b>        | mol%@24h | vol %@24h   | D    | P    | H    | total HSP  |        |
| <b>DMF</b>       | 32.0     | 25.7        | 17.4 | 13.7 | 11.3 | 42.4       |        |
| <b>ether</b>     | 68.0     | 74.3        | 14.5 | 2.9  | 5.1  | 22.5       |        |
| 3.4              |          |             |      |      |      |            |        |
|                  |          |             | Dmix | Pmix | Hmix | "distance" | HSPmix |
|                  |          | for 24h mix | 15.2 | 5.7  | 6.7  | 10.2       | 27.6   |
| <b>E5</b>        | mol%@24h | vol %@24h   | D    | P    | H    | total HSP  |        |
| <b>2,2,2-TFE</b> | 28.0     | 21.4        | 15.4 | 8.3  | 16.4 | 40.1       |        |
| <b>ether</b>     | 71.1     | 78.6        | 14.5 | 2.9  | 5.1  | 22.5       |        |
| 4.0              |          |             |      |      |      |            | total  |
|                  |          |             | Dmix | Pmix | Hmix | "distance" | HSPmix |
|                  |          | for 24h mix | 14.7 | 4.1  | 7.5  | 9.9        | 26.3   |
| <b>E6</b>        | mol%@24h | vol %@24h   | D    | P    | H    | total HSP  |        |
| <b>NMP</b>       | 29.8     | 28.1        | 18.0 | 12.3 | 7.2  | 37.5       |        |
| <b>ether</b>     | 70.2     | 71.9        | 14.5 | 2.9  | 5.1  | 22.5       |        |
| 3.3              |          |             |      |      |      |            |        |
|                  |          |             | Dmix | Pmix | Hmix | "distance" | HSPmix |
|                  |          | for 24h mix | 15.5 | 5.5  | 5.7  | 8.6        | 26.7   |
| <b>E7</b>        | mol%@24h | vol %@24h   | D    | P    | H    | total HSP  |        |
| <b>DMSO</b>      | 57.6     | 48.0        | 18.4 | 16.4 | 10.2 | 45         |        |
| <b>ether</b>     | 42.4     | 52.0        | 14.5 | 2.9  | 5.1  | 22.5       |        |
| 2.2              |          |             |      |      |      |            |        |
|                  |          |             | Dmix | Pmix | Hmix | "distance" | HSPmix |
|                  |          | for 24h mix | 16.4 | 9.4  | 7.5  | 8.5        | 33.3   |
| <b>E8</b>        | mol%@24h | vol %@24h   | D    | P    | H    | total HSP  |        |
| <b>pyridine</b>  | 27.5     | 22.6        | 19.0 | 8.8  | 5.9  | 33.7       |        |
| <b>ether</b>     | 72.5     | 77.4        | 14.5 | 2.9  | 5.1  | 22.5       |        |
| 3.7              |          |             |      |      |      |            |        |
|                  |          |             | Dmix | Pmix | Hmix | "distance" | HSPmix |
|                  |          | for 24h mix | 15.5 | 4.2  | 5.3  | 8.3        | 25.0   |
| <b>E9</b>        | mol%@24h | vol %@24h   | D    | P    | H    | total HSP  |        |
| <b>1,2-DCE</b>   | 26.7     | 21.6        | 19.0 | 7.4  | 4.1  | 30.5       |        |
| <b>ether</b>     | 73.3     | 78.4        | 14.5 | 2.9  | 5.1  | 22.5       |        |
| 3.6              |          |             |      |      |      |            |        |
|                  |          |             | Dmix | Pmix | Hmix | "distance" | HSPmix |
|                  |          | for 24h mix | 15.5 | 3.9  | 4.9  | 7.9        | 24.2   |

|                    |          |             |      |      |      |            |        |
|--------------------|----------|-------------|------|------|------|------------|--------|
| <b>E10</b>         | mol%@24h | vol %@24h   | D    | P    | H    | total HSP  |        |
| <b>acetic acid</b> | 37.3     | 24.5        | 14.5 | 8.0  | 13.5 | 36         |        |
| <b>ether</b>       | 62.7     | 75.5        | 14.5 | 2.9  | 5.1  | 22.5       |        |
| 3.9                |          |             |      |      |      |            |        |
|                    |          |             | Dmix | Pmix | Hmix | "distance" | HSPmix |
|                    |          | for 24h mix | 14.5 | 4.1  | 7.2  | 7.4        | 25.8   |
| <b>E11</b>         | mol%@24h | vol %@24h   | D    | P    | H    | total HSP  |        |
| <b>benzene</b>     | 24.2     | 21.4        | 18.4 | 0.0  | 2.0  | 20.4       |        |
| <b>ether</b>       | 75.8     | 78.6        | 14.5 | 2.9  | 5.1  | 22.5       |        |
| 3.4                |          |             |      |      |      |            |        |
|                    |          |             | Dmix | Pmix | Hmix | "distance" | HSPmix |
|                    |          | for 24h mix | 15.3 | 2.3  | 4.4  | 7.0        | 22.1   |
| <b>E12</b>         | mol%@24h | vol fr@ 24h | D    | P    | H    | total HSP  |        |
| <b>DMPU</b>        | 29.9     | 33.0        | 17.8 | 9.5  | 9.3  | 36.6       |        |
| <b>ether</b>       | 70.1     | 67.0        | 14.5 | 2.9  | 5.1  | 22.5       |        |
| 2.9                |          |             |      |      |      |            |        |
|                    |          |             | Dmix | Pmix | Hmix | "distance" | HSPmix |
|                    |          | for 24h mix | 15.6 | 5.1  | 6.5  | 6.9        | 27.1   |
| <b>E13</b>         | mol%@24h | vol %@24h   | D    | P    | H    | total HSP  |        |
| <b>DCM</b>         | 28.3     | 19.4        | 18.2 | 6.3  | 6.1  | 30.6       |        |
| <b>ether</b>       | 71.7     | 80.6        | 14.5 | 2.9  | 5.1  | 22.5       |        |
| 2.3                |          |             |      |      |      |            |        |
|                    |          |             | Dmix | Pmix | Hmix | "distance" | HSPmix |
|                    |          | for 24h mix | 15.2 | 3.6  | 5.3  | 6.6        | 24.1   |
| <b>E14</b>         | mol%@24h | vol %@24h   | D    | P    | H    | total HSP  |        |
| <b>acetone</b>     | 29.0     | 22.4        | 15.5 | 10.4 | 7.0  | 32.9       |        |
| <b>ether</b>       | 71.0     | 77.6        | 14.5 | 2.9  | 5.1  | 22.5       |        |
| 2.3                |          |             |      |      |      |            |        |
|                    |          |             | Dmix | Pmix | Hmix | "distance" | HSPmix |
|                    |          | for 24h mix | 14.7 | 4.6  | 5.5  | 6.2        | 24.8   |
| <b>E15</b>         | mol%@24h | vol %@24h   | D    | P    | H    | total HSP  |        |
| <b>toluene</b>     | 23.7     | 24.0        | 18.0 | 1.4  | 2.0  | 21.4       |        |
| <b>ether</b>       | 76.3     | 76.0        | 14.5 | 2.9  | 5.1  | 22.5       |        |
| 4.0                |          |             |      |      |      |            |        |
|                    |          |             | Dmix | Pmix | Hmix | "distance" | HSPmix |
|                    |          | for 24h mix | 15.3 | 2.5  | 4.4  | 5.9        | 22.2   |

|                                                                                                       |          |             |      |      |      |            |        |
|-------------------------------------------------------------------------------------------------------|----------|-------------|------|------|------|------------|--------|
| <b>E16</b>                                                                                            | mol%@24h | vol %@24h   | D    | P    | H    | total HSP  |        |
| <b>chloroform</b>                                                                                     | 24.0     | 19.6        | 17.8 | 3.1  | 5.7  | 26.6       |        |
| <b>ether</b>                                                                                          | 76.0     | 80.4        | 14.5 | 2.9  | 5.1  | 22.5       |        |
| 3.7                                                                                                   |          |             |      |      |      |            |        |
|                                                                                                       |          |             | Dmix | Pmix | Hmix | "distance" | HSPmix |
|                                                                                                       |          | for 24h mix | 15.1 | 2.9  | 5.2  | 5.3        | 23.3   |
| <b>E17</b>                                                                                            | mol%@24h | vol %@24h   | D    | P    | H    | total HSP  |        |
| <b>ethyl acetate</b>                                                                                  | 24.9     | 23.8        | 15.8 | 5.3  | 7.2  | 28.3       |        |
| <b>ether</b>                                                                                          | 75.1     | 76.2        | 14.5 | 2.9  | 5.1  | 22.5       |        |
| 3.3                                                                                                   |          |             |      |      |      |            |        |
|                                                                                                       |          |             | Dmix | Pmix | Hmix | "distance" | HSPmix |
|                                                                                                       |          | for 24h mix | 14.8 | 3.5  | 5.6  | 3.1        | 23.9   |
| <b>Calculations for pentane diffusions at 24 h diffusion time (ranked by decreasing HSP distance)</b> |          |             |      |      |      |            |        |
| <b>P1</b>                                                                                             | mol%@24h | vol %@24h   | D    | P    | H    | total HSP  |        |
| <b>ethanol</b>                                                                                        | 61.2     | 44.3        | 15.8 | 8.8  | 19.4 | 44         |        |
| <b>pentane</b>                                                                                        | 38.8     | 55.7        | 14.5 | 0.0  | 0.0  | 14.5       |        |
| 1.9                                                                                                   |          |             |      |      |      |            |        |
|                                                                                                       |          |             | Dmix | Pmix | Hmix | "distance" | HSPmix |
|                                                                                                       |          | for 24h mix | 15.1 | 3.9  | 8.6  | 12.0       | 27.6   |
| <b>P2</b>                                                                                             | mol%@24h | vol %@24h   | D    | P    | H    | total HSP  |        |
| <b>pyridine</b>                                                                                       | 39.0     | 30.8        | 19.0 | 8.8  | 5.9  | 33.7       |        |
| <b>pentane</b>                                                                                        | 61.0     | 69.2        | 14.5 | 0.0  | 0.0  | 14.5       |        |
| 2.8                                                                                                   |          |             |      |      |      |            |        |
|                                                                                                       |          |             | Dmix | Pmix | Hmix | "distance" | HSPmix |
|                                                                                                       |          | for 24h mix | 15.9 | 2.7  | 1.8  | 9.6        | 20.4   |
| <b>P3</b>                                                                                             | mol%@24h | vol %@24h   | D    | P    | H    | total HSP  |        |
| <b>1,2-DCE</b>                                                                                        | 39.1     | 30.5        | 19.0 | 7.4  | 4.1  | 30.5       |        |
| <b>pentane</b>                                                                                        | 60.9     | 69.5        | 14.5 | 0.0  | 0.0  | 14.5       |        |
| 2.8                                                                                                   |          |             |      |      |      |            |        |
|                                                                                                       |          |             | Dmix | Pmix | Hmix | "distance" | HSPmix |
|                                                                                                       |          | for 24h mix | 15.9 | 2.3  | 1.3  | 8.6        | 19.4   |
| <b>P4</b>                                                                                             | mol%@24h | vol %@24h   | D    | P    | H    | total HSP  |        |
| <b>acetone</b>                                                                                        | 44.9     | 34.2        | 15.5 | 10.4 | 7.0  | 32.9       |        |
| <b>pentane</b>                                                                                        | 55.1     | 65.8        | 14.5 | 0.0  | 0.0  | 14.5       |        |
| 1.4                                                                                                   |          |             |      |      |      |            |        |
|                                                                                                       |          |             | Dmix | Pmix | Hmix | "distance" | HSPmix |
|                                                                                                       |          | for 24h mix | 14.8 | 3.6  | 2.4  | 8.4        | 20.8   |

|                      |          |             |      |      |      |            |        |
|----------------------|----------|-------------|------|------|------|------------|--------|
| <b>P5</b>            | mol%@24h | vol %@24h   | D    | P    | H    | total HSP  |        |
| <b>THF</b>           | 31.2     | 24.2        | 16.8 | 5.7  | 8.0  | 30.5       |        |
| <b>pentane</b>       | 68.8     | 75.8        | 14.5 | 0.0  | 0.0  | 14.5       |        |
| 2.7                  |          |             |      |      |      |            |        |
|                      |          |             | Dmix | Pmix | Hmix | "distance" | HSPmix |
|                      |          | for 24h mix | 15.1 | 1.4  | 1.9  | 8.2        | 18.4   |
| <b>P6</b>            | mol%@24h | vol %@24h   | D    | P    | H    | total HSP  |        |
| <b>ethyl acetate</b> | 31.5     | 28.0        | 15.8 | 5.3  | 7.2  | 28.3       |        |
| <b>pentane</b>       | 68.5     | 72.0        | 14.5 | 0.0  | 0.0  | 14.5       |        |
| 2.4                  |          |             |      |      |      |            |        |
|                      |          |             | Dmix | Pmix | Hmix | "distance" | HSPmix |
|                      |          | for 24h mix | 14.9 | 1.5  | 2.0  | 6.7        | 18.4   |
| <b>P7</b>            | mol%@24h | vol %@24h   | D    | P    | H    | total HSP  |        |
| <b>chloroform</b>    | 36.9     | 28.9        | 17.8 | 3.1  | 5.7  | 26.6       |        |
| <b>pentane</b>       | 63.1     | 71.1        | 14.5 | 0.0  | 0.0  | 14.5       |        |
| 2.3                  |          |             |      |      |      |            |        |
|                      |          |             | Dmix | Pmix | Hmix | "distance" | HSPmix |
|                      |          | for 24h mix | 15.5 | 0.9  | 1.6  | 6.6        | 18.0   |
| <b>P8</b>            | mol%@24h | vol %@24h   | D    | P    | H    | total HSP  |        |
| <b>2-Me-THF</b>      | 26.0     | 23.3        | 16.9 | 5.0  | 4.3  | 26.2       |        |
| <b>pentane</b>       | 74.0     | 76.7        | 14.5 | 0.0  | 0.0  | 14.5       |        |
| 3.1                  |          |             |      |      |      |            |        |
|                      |          |             | Dmix | Pmix | Hmix | "distance" | HSPmix |
|                      |          | for 24h mix | 15.1 | 1.2  | 1.0  | 6.3        | 17.2   |
| <b>P9</b>            | mol%@24h | vol %@24h   | D    | P    | H    | total HSP  |        |
| <b>benzene</b>       | 28.4     | 23.4        | 18.4 | 0.0  | 2.0  | 20.4       |        |
| <b>pentane</b>       | 71.6     | 76.6        | 14.5 | 0.0  | 0.0  | 14.5       |        |
| 3.1                  |          |             |      |      |      |            |        |
|                      |          |             | Dmix | Pmix | Hmix | "distance" | HSPmix |
|                      |          | for 24h mix | 15.4 | 0.0  | 0.5  | 6.2        | 15.9   |
| <b>P10</b>           | mol%@24h | vol %@24h   | D    | P    | H    | total HSP  |        |
| <b>toluene</b>       | 25.9     | 24.3        | 18.0 | 1.4  | 2.0  | 21.4       |        |
| <b>pentane</b>       | 74.1     | 75.7        | 14.5 | 0.0  | 0.0  | 14.5       |        |
| 3.6                  |          |             |      |      |      |            |        |
|                      |          |             | Dmix | Pmix | Hmix | "distance" | HSPmix |
|                      |          | for 24h mix | 15.4 | 0.3  | 0.5  | 5.6        | 16.2   |



| Calculations for benzene diffusions at 24 h diffusion time (ranked by decreasing HSP distance) |          |             |      |      |      |            |        |
|------------------------------------------------------------------------------------------------|----------|-------------|------|------|------|------------|--------|
| <b>B1</b>                                                                                      | mol%@24h | vol %@24h   | D    | P    | H    | total HSP  |        |
| <b>DMF</b>                                                                                     | 64.3     | 60.8        | 17.4 | 13.7 | 11.3 | 42.4       |        |
| <b>benzene</b>                                                                                 | 35.7     | 39.2        | 18.4 | 0.0  | 2.0  | 20.4       |        |
| 1.5                                                                                            |          |             |      |      |      |            |        |
|                                                                                                |          |             | Dmix | Pmix | Hmix | "distance" | HSPmix |
|                                                                                                |          | for 24h mix | 17.8 | 8.3  | 7.7  | 6.5        | 33.8   |
| <b>B2</b>                                                                                      | mol%@24h | vol %@24h   | D    | P    | H    | total HSP  |        |
| <b>DMSO</b>                                                                                    | 75.2     | 70.7        | 18.4 | 16.4 | 10.2 | 45         |        |
| <b>benzene</b>                                                                                 | 24.8     | 29.3        | 18.4 | 0.0  | 2.0  | 20.4       |        |
| 1.5                                                                                            |          |             |      |      |      |            |        |
|                                                                                                |          |             | Dmix | Pmix | Hmix | "distance" | HSPmix |
|                                                                                                |          | for 24h mix | 18.4 | 11.6 | 7.8  | 5.4        | 37.8   |
| <b>B3</b>                                                                                      | mol%@24h | vol %@24h   | D    | P    | H    | total HSP  |        |
| <b>acetic acid</b>                                                                             | 80.1     | 72.0        | 14.5 | 8.0  | 13.5 | 36         |        |
| <b>benzene</b>                                                                                 | 19.9     | 28.0        | 18.4 | 0.0  | 2.0  | 20.4       |        |
| 1.4                                                                                            |          |             |      |      |      |            |        |
|                                                                                                |          |             | Dmix | Pmix | Hmix | "distance" | HSPmix |
|                                                                                                |          | for 24h mix | 15.6 | 5.8  | 10.3 | 4.5        | 31.6   |
| <b>B4</b>                                                                                      | mol%@24h | vol %@24h   | D    | P    | H    | total HSP  |        |
| <b>NMP</b>                                                                                     | 65.7     | 67.4        | 18.0 | 12.3 | 7.2  | 37.5       |        |
| <b>benzene</b>                                                                                 | 34.3     | 32.6        | 18.4 | 0.0  | 2.0  | 20.4       |        |
| 1.6                                                                                            |          |             |      |      |      |            |        |
|                                                                                                |          |             | Dmix | Pmix | Hmix | "distance" | HSPmix |
|                                                                                                |          | for 24h mix | 18.1 | 8.3  | 5.5  | 4.4        | 31.9   |
| <b>B5</b>                                                                                      | mol%@24h | vol %@24h   | D    | P    | H    | total HSP  |        |
| <b>DMPU</b>                                                                                    | 57.6     | 64.8        | 17.8 | 9.5  | 9.3  | 36.6       |        |
| <b>benzene</b>                                                                                 | 42.4     | 35.2        | 18.4 | 0.0  | 2.0  | 20.4       |        |
| 1.6                                                                                            |          |             |      |      |      |            |        |
|                                                                                                |          |             | Dmix | Pmix | Hmix | "distance" | HSPmix |
|                                                                                                |          | for 24h mix | 18.0 | 6.2  | 6.7  | 4.2        | 30.9   |
| <b>B6</b>                                                                                      | mol%@24h | vol %@24h   | D    | P    | H    | total HSP  |        |
| <b>pyridine</b>                                                                                | 63.0     | 60.6        | 19.0 | 8.8  | 5.9  | 33.7       |        |
| <b>benzene</b>                                                                                 | 37.0     | 39.4        | 18.4 | 0.0  | 2.0  | 20.4       |        |
| 1.5                                                                                            |          |             |      |      |      |            |        |
|                                                                                                |          |             | Dmix | Pmix | Hmix | "distance" | HSPmix |
|                                                                                                |          | for 24h mix | 18.8 | 5.3  | 4.4  | 3.8        | 28.5   |

| Calculations for miscellaneous diffusions at 24 h diffusion time (ranked by decreasing HSP distance) |          |             |      |      |      |            |        |
|------------------------------------------------------------------------------------------------------|----------|-------------|------|------|------|------------|--------|
| <b>M1</b>                                                                                            | mol%@24h | vol %@24h   | D    | P    | H    | total HSP  |        |
| <b>methanol</b>                                                                                      | 45.9     | 31.8        | 15.1 | 12.3 | 22.3 | 49.7       |        |
| <b>acetone</b>                                                                                       | 54.1     | 68.2        | 15.5 | 10.4 | 7.0  | 32.9       |        |
| 1.7                                                                                                  |          |             |      |      |      |            |        |
|                                                                                                      |          |             | Dmix | Pmix | Hmix | "distance" | HSPmix |
|                                                                                                      |          | for 24h mix | 15.4 | 11.0 | 11.9 | 10.5       | 38.2   |
| <b>M2</b>                                                                                            | mol%@24h | vol %@24h   | D    | P    | H    | total HSP  |        |
| <b>ethanol</b>                                                                                       | 43.5     | 37.8        | 15.8 | 8.8  | 19.4 | 44         |        |
| <b>acetone</b>                                                                                       | 56.5     | 62.2        | 15.5 | 10.4 | 7.0  | 32.9       |        |
| 1.9                                                                                                  |          |             |      |      |      |            |        |
|                                                                                                      |          |             | Dmix | Pmix | Hmix | "distance" | HSPmix |
|                                                                                                      |          | for 24h mix | 15.6 | 9.8  | 11.7 | 7.8        | 37.1   |
| <b>M3</b>                                                                                            | mol%@24h | vol %@24h   | D    | P    | H    | total HSP  |        |
| <b>acetonitrile</b>                                                                                  | 53.3     | 42.4        | 15.3 | 18.0 | 6.1  | 39.4       |        |
| <b>THF</b>                                                                                           | 46.7     | 57.6        | 16.8 | 5.7  | 8.0  | 30.5       |        |
| 1.5                                                                                                  |          |             |      |      |      |            |        |
|                                                                                                      |          |             | Dmix | Pmix | Hmix | "distance" | HSPmix |
|                                                                                                      |          | for 24h mix | 16.2 | 10.9 | 7.2  | 7.4        | 34.3   |
| <b>M4</b>                                                                                            | mol%@24h | vol %@24h   | D    | P    | H    | total HSP  |        |
| <b>water</b>                                                                                         | 83.1     | 54.5        | 18.1 | 17.1 | 16.9 | 52.1       |        |
| <b>acetone</b>                                                                                       | 16.9     | 45.5        | 15.5 | 10.4 | 7.0  | 32.9       |        |
| 1.7                                                                                                  |          |             |      |      |      |            |        |
|                                                                                                      |          |             | Dmix | Pmix | Hmix | "distance" | HSPmix |
|                                                                                                      |          | for 24h mix | 16.9 | 14.0 | 12.4 | 5.9        | 43.4   |
| <b>M5</b>                                                                                            | mol%@24h | vol %@24h   | D    | P    | H    | total HSP  |        |
| <b>2,2,2-TFE</b>                                                                                     | 45.3     | 42.3        | 15.4 | 8.3  | 16.4 | 40.1       |        |
| <b>THF</b>                                                                                           | 54.7     | 57.7        | 16.8 | 5.7  | 8.0  | 30.5       |        |
| 2.1                                                                                                  |          |             |      |      |      |            |        |
|                                                                                                      |          |             | Dmix | Pmix | Hmix | "distance" | HSPmix |
|                                                                                                      |          | for 24h mix | 16.2 | 6.8  | 11.6 | 5.3        | 34.6   |
| <b>M6</b>                                                                                            | mol%@24h | vol %@24h   | D    | P    | H    | total HSP  |        |
| <b>water</b>                                                                                         | 93.0     | 74.5        | 18.1 | 17.1 | 16.9 | 52.1       |        |
| <b>THF</b>                                                                                           | 7.0      | 25.5        | 16.8 | 5.7  | 8.0  | 30.5       |        |
| 1.4                                                                                                  |          |             |      |      |      |            |        |
|                                                                                                      |          |             | Dmix | Pmix | Hmix | "distance" | HSPmix |
|                                                                                                      |          | for 24h mix | 17.8 | 14.2 | 14.6 | 3.7        | 46.6   |

|                                                                                                                  |          |             |      |      |      |            |        |
|------------------------------------------------------------------------------------------------------------------|----------|-------------|------|------|------|------------|--------|
| <b>M7</b>                                                                                                        | mol%@24h | vol %@24h   | D    | P    | H    | total HSP  |        |
| <b>water</b>                                                                                                     | 82.5     | 67.6        | 18.1 | 17.1 | 16.9 | 52.1       |        |
| <b>methanol</b>                                                                                                  | 17.5     | 32.4        | 15.1 | 12.3 | 22.3 | 49.7       |        |
| 1.4                                                                                                              |          |             |      |      |      |            |        |
|                                                                                                                  |          |             | Dmix | Pmix | Hmix | "distance" | HSPmix |
|                                                                                                                  |          | for 24h mix | 17.1 | 15.5 | 18.7 | 3.0        | 51.3   |
| <b>M8</b>                                                                                                        | mol%@24h | vol %@24h   | D    | P    | H    | total HSP  |        |
| <b>water</b>                                                                                                     | 93.2     | 82.4        | 18.1 | 17.1 | 16.9 | 52.1       |        |
| <b>acetonitrile</b>                                                                                              | 6.8      | 17.6        | 15.3 | 18.0 | 6.1  | 39.4       |        |
| 1.2                                                                                                              |          |             |      |      |      |            |        |
|                                                                                                                  |          |             | Dmix | Pmix | Hmix | "distance" | HSPmix |
|                                                                                                                  |          | for 24h mix | 17.6 | 17.3 | 15.0 | 2.1        | 49.9   |
| <b>M9</b>                                                                                                        | mol%@24h | vol %@24h   | D    | P    | H    | total HSP  |        |
| <b>water</b>                                                                                                     | 93.2     | 80.8        | 18.1 | 17.1 | 16.9 | 52.1       |        |
| <b>ethanol</b>                                                                                                   | 6.8      | 19.2        | 15.8 | 8.8  | 19.4 | 44         |        |
| 1.2                                                                                                              |          |             |      |      |      |            |        |
|                                                                                                                  |          |             | Dmix | Pmix | Hmix | "distance" | HSPmix |
|                                                                                                                  |          | for 24h mix | 17.7 | 15.5 | 17.4 | 1.9        | 50.5   |
| <b>M10</b>                                                                                                       | mol%@24h | vol %@24h   | D    | P    | H    | total HSP  |        |
| <b>DMF</b>                                                                                                       | 72.8     | 91.4        | 17.4 | 13.7 | 11.3 | 42.4       |        |
| <b>water</b>                                                                                                     | 27.2     | 8.6         | 18.1 | 17.1 | 16.9 | 52.1       |        |
| 1.1                                                                                                              |          |             |      |      |      |            |        |
|                                                                                                                  |          |             | Dmix | Pmix | Hmix | "distance" | HSPmix |
|                                                                                                                  |          | for 24h mix | 17.5 | 14.0 | 11.8 | 0.6        | 43.2   |
| <b>M11</b>                                                                                                       | mol%@24h | vol %@24h   | D    | P    | H    | total HSP  |        |
| <b>DMSO</b>                                                                                                      | 76.0     | 92.6        | 18.4 | 16.4 | 10.2 | 45         |        |
| <b>water</b>                                                                                                     | 24.0     | 7.4         | 18.1 | 17.1 | 16.9 | 52.1       |        |
| 1.1                                                                                                              |          |             |      |      |      |            |        |
|                                                                                                                  |          |             | Dmix | Pmix | Hmix | "distance" | HSPmix |
|                                                                                                                  |          | for 24h mix | 18.4 | 16.5 | 10.7 | 0.5        | 45.5   |
| <b>Calculations for the low-volume-change diffusions at 24 h diffusion time (ranked by decreasing HSP distan</b> |          |             |      |      |      |            |        |
| <b>LV1</b>                                                                                                       | mol%@24h | vol %@24h   | D    | P    | H    | total HSP  |        |
| <b>Et3N</b>                                                                                                      | 36.5     | 66.2        | 17.8 | 0.4  | 1.0  | 19.2       |        |
| <b>methanol</b>                                                                                                  | 63.5     | 33.8        | 15.1 | 12.3 | 22.3 | 49.7       |        |
| 1.0                                                                                                              |          |             |      |      |      |            |        |
|                                                                                                                  |          |             | Dmix | Pmix | Hmix | "distance" | HSPmix |
|                                                                                                                  |          | for 24h mix | 16.9 | 4.4  | 8.2  | 8.4        | 29.5   |

| LV2                 | mol%@24h | vol %@24h   | D    | P    | H    | total HSP  |        |
|---------------------|----------|-------------|------|------|------|------------|--------|
| <b>acetonitrile</b> | 71.4     | 59.5        | 15.3 | 18.0 | 6.1  | 39.4       |        |
| <b>benzene</b>      | 28.6     | 40.5        | 18.4 | 0.0  | 2.0  | 20.4       |        |
| 1.1                 |          |             |      |      |      |            |        |
|                     |          |             | Dmix | Pmix | Hmix | "distance" | HSPmix |
|                     |          | for 24h mix | 16.6 | 10.7 | 4.4  | 7.9        | 31.7   |
|                     |          |             |      |      |      |            |        |
| LV3                 | mol%@24h | vol %@24h   | D    | P    | H    | total HSP  |        |
| <b>DCM</b>          | 49.2     | 34.8        | 18.2 | 6.3  | 6.1  | 30.6       |        |
| <b>pentane</b>      | 50.8     | 65.2        | 14.5 | 0.0  | 0.0  | 14.5       |        |
| 1.0                 |          |             |      |      |      |            |        |
|                     |          |             | Dmix | Pmix | Hmix | "distance" | HSPmix |
|                     |          | for 24h mix | 15.8 | 2.2  | 2.1  | 7.5        | 20.1   |
|                     |          |             |      |      |      |            |        |
| LV4                 | mol%@24h | vol %@24h   | D    | P    | H    | total HSP  |        |
| <b>ether</b>        | 22.9     | 21.1        | 14.5 | 2.9  | 5.1  | 22.5       |        |
| <b>pentane</b>      | 77.1     | 78.9        | 14.5 | 0.0  | 0.0  | 14.5       |        |
| 0.7                 |          | 100.00      |      |      |      |            |        |
|                     |          |             | Dmix | Pmix | Hmix | "distance" | HSPmix |
|                     |          | for 24h mix | 14.5 | 0.6  | 1.1  | 4.6        | 16.2   |
|                     |          |             |      |      |      |            |        |
| LV5                 | mol%@24h | vol %@24h   | D    | P    | H    | total HSP  |        |
| <b>2,2,2-TFE</b>    | 83.7     | 80.6        | 15.4 | 8.3  | 16.4 | 40.1       |        |
| <b>benzene</b>      | 16.3     | 19.4        | 18.4 | 0.0  | 2.0  | 20.4       |        |
| 1.1                 |          |             |      |      |      |            |        |
|                     |          |             | Dmix | Pmix | Hmix | "distance" | HSPmix |
|                     |          | for 24h mix | 16.0 | 6.7  | 13.6 | 3.4        | 36.3   |
|                     |          |             |      |      |      |            |        |
| LV6                 | mol%@24h | vol %@24h   | D    | P    | H    | total HSP  |        |
| <b>1,2-DCE</b>      | 68.8     | 66.2        | 19.0 | 7.4  | 4.1  | 30.5       |        |
| <b>benzene</b>      | 31.2     | 33.8        | 18.4 | 0.0  | 2.0  | 20.4       |        |
| 1.1                 |          | 100.00      |      |      |      |            |        |
|                     |          |             | Dmix | Pmix | Hmix | "distance" | HSPmix |
|                     |          | for 24h mix | 18.8 | 4.9  | 3.4  | 2.6        | 27.1   |

1. From Christian Reichardt, "Solvents and Solvent Effects in Organic Chemistry", Wiley-VCH Publ., 4th Ed, 2011; Weinheim, Germany; pp 453-461.
2. From Charles M. Hansen, "Hansen Solubility Parameters: A User's Handbook", CRC Press 2nd Ed., 2007; Boca Raton, FL.; pp 345-483.
